# Supplementary material for: Modulated assembly and structural diversity of heterometallic Sn–Ti oxo clusters from inorganic tin precursors
Source: Royal Society of Chemistry journal article supplement (doi:10.1039/d4nr02644f), 2024-01-01
Supplement: d4nr02644f1.pdf [file d4nr02644f1.pdf]

< Electronic Supporting Information >

**Modulated assembly and structural diversity of heterometallic  
Sn-Ti oxo clusters from inorganic tin precursors**

Hui-Fang Zhao,<sup>a</sup> Fang-Fang Liu,<sup>a</sup> Qing-Rong Ding,<sup>a</sup> Di Wang,<sup>a</sup> Jian Zhang,<sup>a</sup> and Lei Zhang<sup>a,b\*</sup>

<sup>a</sup>*State Key Laboratory of Structural Chemistry, Fujian Institute of Research on the Structure of Matter, Chinese Academy of Sciences, Fuzhou, Fujian 350002, China.*

<sup>b</sup>*Institute of Modern Optics, College of Electronic Information and Optical Engineering, Nankai University, Tianjin 300350, China.*

*E-mail: [zhanglei3915@nankai.edu.cn](mailto:zhanglei3915@nankai.edu.cn).*

## Content

|                                                                 |     |
|-----------------------------------------------------------------|-----|
| 1. Materials and instruments .....                              | S3  |
| 2. Synthesis .....                                              | S3  |
| 3. Single-crystal X-ray diffraction.....                        | S5  |
| 4. Bond valence sum calculations .....                          | S8  |
| 5. Additional structural pictures.....                          | S9  |
| 6. Powder-XRD patterns.....                                     | S11 |
| 7. The energy dispersive X-ray spectroscopy (EDS) spectra ..... | S12 |
| 8. Thermogravimetical analysis (TG) .....                       | S14 |
| 9. IR spectra.....                                              | S15 |
| 10. UV-Vis parameters.....                                      | S16 |
| 11. ICP results.....                                            | S17 |
| 12. Additional texts.....                                       | S17 |
| 13. Electrochemical Measurements .....                          | S18 |
| 14. Faraday efficiency patterns .....                           | S19 |
| 15. Stability testing of compounds.....                         | S20 |
| 16. Reference .....                                             | S21 |

## 1. Materials and instruments

All the reagents and solvents employed are purchased commercially and used as received without further treatment.  $\text{SnCl}_2 \cdot 2\text{H}_2\text{O}$  and  $\text{SnCl}_4 \cdot 5\text{H}_2\text{O}$  were purchased from Energy Chemical, trimethylolpropane and di(trimethylolpropane) were purchased from Aladdin.  $\text{Ti}(\text{O}^i\text{Pr})_4$  was purchased from Adamas, while ethyl acetate, acetonitrile, 1,4-dioxane, formic acid, acetic acid and propionic acid were bought from Sino pharm Chemical Reagent Beijing. Powder X-ray diffraction (PXRD) analyses data were mounted on a Rigaku Mini Flex II diffractometer using  $\text{Cu K}\alpha$  radiation ( $\lambda = 1.54056 \text{ \AA}$ ) under ambient conditions. Fourier transform infrared (FT-IR) spectra were recorded with a Spectrum One FT-IR Spectrometer in the  $400\text{-}4000 \text{ cm}^{-1}$  range. Thermal stabilities were investigated by a Mettler Toledo TGA/SDTA 851e analyzer in  $\text{N}_2$  atmosphere with a heating rate of  $10 \text{ }^\circ\text{C}/\text{min}$  under  $\text{N}_2$  atmosphere. Elemental analyses were measured on a Vario MICRO Elemental Analyzer instrument. The UV-vis diffuse reflection data were recorded at room temperature using a powder sample with  $\text{BaSO}_4$  as a standard (100% reflectance) on a PerkinElmer Lambda-950 UV spectrophotometer and scanned from 200 to 800 nm. The energy dispersive spectroscopy (EDS) analyses of single crystals were performed on a JEOL JSM6700F field-emission scanning electron microscope equipped with an Oxford INCA system. ESI-MS was carried out on Thermo Scientific Exactive Plus. Inductively coupled plasma (ICP) analyses for Sn and Ti were conducted on an Ultima2 spectrometer. X-ray photoelectron spectroscopy (XPS) analysis was carried out on ESCALAB Xi+ XPS system (Thermo Fisher Scientific) with  $\text{Al K}\alpha$  X-ray radiation (1486.6 eV). Routine  $^1\text{H}$  NMR spectra were recorded on a Bruker AVANCE III (400 MHz for  $^1\text{H}$  NMR). Gas chromatography (GC) was performed with an GC-2014C (SHIMADZU) gas chromatography system equipped with flame ionization detectors and a thermal conductivity detector (TCD). The liquid products were detected by CIC-D100 automatic range ion chromatograph.

## 2. Synthesis

### Synthesis of TOC-51

$\text{SnCl}_4 \cdot 5\text{H}_2\text{O}$  (0.35 g, 1.0 mmol), trimethylolpropane (0.27 g, 2.0 mmol), 1,4-dioxane (4 ml) and 4 ml ethyl acetate were mixed together. Then  $\text{Ti}(\text{O}^i\text{Pr})_4$  (0.50 ml, 1.50 mmol) was added. The mixture were mixed and sealed in a 20 mL vial, and then transferred to a preheated oven at  $80 \text{ }^\circ\text{C}$  and heated for 3 days. After Leave the vial at room temperature for 6 days, colorless crystals of **TOC-51** were obtained with a yield of ~45% based on Sn. Elemental analysis (%): Calcd for  $\text{C}_{72}\text{H}_{142}\text{Cl}_{18}\text{O}_{50}\text{Sn}_6\text{Ti}_{10}$ : C, 23.78; H, 3.94. Found: C, 23.8; H, 4.01.

### Synthesis of TOC-52

$\text{SnCl}_4 \cdot 5\text{H}_2\text{O}$  (0.35g, 1.0 mmol), trimethylolpropane (0.27 g, 2.0 mmol), 1,4-dioxane (6 ml) and 1 ml propionic acid were mixed together. Then  $\text{Ti}(\text{O}^i\text{Pr})_4$  (0.50 ml, 1.50 mmol) was added. The mixture were mixed and sealed in a 20 mL vial, and then transferred to a preheated oven at  $80 \text{ }^\circ\text{C}$  and heated for 3 days. After Leave the vial at room temperature for 6 days, colorless crystals of **TOC-52** were obtained with a yield of ~33% based on Sn. Elemental analysis (%): Calcd for  $\text{C}_{74}\text{H}_{146}\text{Cl}_{18}\text{O}_{50}\text{Sn}_6\text{Ti}_{10}$ : C, 24.25; H, 4.02. Found: C, 24.73; H, 4.03.

### Synthesis of TOC-53

$\text{SnCl}_4 \cdot 5\text{H}_2\text{O}$  (0.35 g, 1.0 mmol), di(trimethylolpropane) (0.25 g, 1.0 mmol), acetonitrile (2 ml) and 4 ml ethyl acetate were mixed together. Then  $\text{Ti}(\text{O}^i\text{Pr})_4$  (0.50 ml, 1.50 mmol) was added. The mixture were mixed and sealed in a 20 mL vial, and then transferred to a preheated oven at 80 °C and heated for 5 days. After cooling to room temperature, colorless crystals of **TOC-53** were obtained with a yield of ~27% based on Sn. Elemental analysis (%): Calcd for  $\text{C}_{14}\text{H}_{25}\text{Cl}_3\text{O}_7\text{SnTi}$ : C, 29.08; H, 4.36. Found: C, 29.17; H, 4.36.

### Synthesis of TOC-54

$\text{SnCl}_4 \cdot 5\text{H}_2\text{O}$  (0.35 g, 1.0 mmol), di(trimethylolpropane) (0.25 g, 1.0 mmol), acetonitrile (5 ml) and 2 ml propionic acid were mixed together. Then  $\text{Ti}(\text{O}^i\text{Pr})_4$  (0.50 ml, 1.50 mmol) was added. The mixture were mixed and sealed in a 20 mL vial, and then transferred to a preheated oven at 80 °C and heated for 5 days. After cooling to room temperature, colorless crystals of **TOC-54** were obtained with a yield of ~37% based on Sn. Elemental analysis (%): Calcd for  $\text{C}_{15}\text{H}_{27}\text{Cl}_3\text{O}_7\text{SnTi}$ : C, 30.42; H, 4.59. Found: C, 27.36; H, 4.34.

### Synthesis of TOC-55

$\text{SnCl}_4 \cdot 5\text{H}_2\text{O}$  (0.35 g, 1.0 mmol), di(trimethylolpropane) (0.25 g, 1.0 mmol), acetonitrile (3 ml) and 3 ml 1,4-dioxane were mixed together. Then  $\text{Ti}(\text{O}^i\text{Pr})_4$  (0.50 ml, 1.50 mmol) was added. The mixture were mixed and sealed in a 20 mL vial, and then transferred to a preheated oven at 80 °C and heated for 5 days. After cooling to room temperature, colorless crystals of **TOC-55** were obtained with a yield of ~36% based on Sn. Elemental analysis (%): Calcd for  $\text{C}_{24}\text{H}_{48}\text{Cl}_6\text{O}_{13}\text{Sn}_2\text{Ti}_2$ : C, 26.43; H, 4.44. Found: C, 30.08; H, 5.10.

### Synthesis of TOC-56

$\text{SnCl}_4 \cdot 5\text{H}_2\text{O}$  (0.35 g, 1.0 mmol), di(trimethylolpropane) (0.25 g, 1.0 mmol), acetonitrile (5 ml) and 50  $\mu\text{L}$  propionic acid were mixed together. Then  $\text{Ti}(\text{O}^i\text{Pr})_4$  (0.50 ml, 1.50 mmol) was added. The mixture were mixed and sealed in a 20 mL vial, and then transferred to a preheated oven at 80 °C and heated for 5 days. After cooling to room temperature, colorless crystals of **TOC-56** were obtained with a yield of ~65% based on Sn. Elemental analysis (%): Calcd for  $\text{C}_{48}\text{H}_{90}\text{Cl}_6\text{O}_{26}\text{Sn}_2\text{Ti}_6$ : C, 31.67; H, 4.98. Found: C, 28.69; H 4.93.

### Synthesis of TOC-57

$\text{SnCl}_2 \cdot 2\text{H}_2\text{O}$  (0.34 g, 1.5 mmol), di(trimethylolpropane) (0.25g, 1.0 mmol), acetonitrile (5 ml) and 50  $\mu\text{L}$  acetic acid were mixed together. Then  $\text{Ti}(\text{O}^i\text{Pr})_4$  (0.50 ml, 1.50 mmol) was added. The mixture were mixed and sealed in a 20 mL vial, and then transferred to a preheated oven at 80 °C and heated for 5 days. After cooling to room temperature, yellow crystals of **TOC-57** were obtained with a yield of ~88% based on Sn. Elemental analysis (%): Calcd for  $\text{C}_{96}\text{H}_{178}\text{Cl}_{14}\text{O}_{54}\text{Sn}_6\text{Ti}_{14}$ : C, 28.29; H, 4.40. Found: C, 28.47; H, 4.52.

### Synthesis of TOC-58

$\text{SnCl}_2 \cdot 2\text{H}_2\text{O}$  (0.34 g, 1.5 mmol), di(trimethylolpropane) (0.25 g, 1.0 mmol), acetonitrile (5 ml) and 50  $\mu\text{L}$  formic acid were mixed together. Then  $\text{Ti}(\text{O}^i\text{Pr})_4$  (0.50 ml, 1.50 mmol) was added. The mixture were mixed and sealed in a 20 mL vial, and then transferred to a preheated oven at 80 °C and heated for 5 days. After cooling to room temperature, red crystals of **TOC-58** were

obtained with a yield of ~35% based on Sn. Elemental analysis (%): Calcd for  $C_{144}H_{264}Cl_{12}O_{82}Sn_8Ti_{20}$ : C, 30.67; H, 4.72. Found: C, 27.18; H, 4.62.

### 3. Single-crystal X-ray diffraction

Single-crystal diffraction data for compounds were collected on Hybrid Pixel Array detector equipped with Ga-K $\alpha$  radiation ( $\lambda = 1.3405 \text{ \AA}$ ). Using Olex2,[1] the structures were solved with the dual-direct methods using ShelxT and refined with the full-matrix least-squares technique based on  $F^2$  using the SHELXL.[2-4] Non-hydrogen atoms were refined anisotropically. Hydrogen atoms were added theoretically. The obtained crystallographic data for compound summarized in Table S1–S4. The X-ray crystallographic coordinates for structures reported in this article have been deposited at the Cambridge Crystallographic Data Centre (CCDC) under deposition numbers CCDC 2365528-2365535. These data can be obtained free of charge from the Cambridge Crystallographic Data Centre via [http://www.ccdc.cam.ac.uk/data\\_request/cif](http://www.ccdc.cam.ac.uk/data_request/cif).

**Table S1** Crystal data and structure refinement for **TOC-51** and **TOC-52**.

| Compound                                       | TOC-51                                                         | TOC-52                                                         |
|------------------------------------------------|----------------------------------------------------------------|----------------------------------------------------------------|
| Crystal formula                                | $C_{72}H_{142}Cl_{18}O_{50}Sn_6Ti_{10}$                        | $C_{74}H_{146}Cl_{18}O_{50}Sn_6Ti_{10}$                        |
| Formula weight                                 | 3636.95                                                        | 3665.14                                                        |
| Temperature/K                                  | 100.0(3)                                                       | 293(2)                                                         |
| Crystal system                                 | triclinic                                                      | monoclinic                                                     |
| Space group                                    | $P-1$                                                          | $P21/n$                                                        |
| a/Å                                            | 12.9762(2)                                                     | 15.60310(10)                                                   |
| b/Å                                            | 22.6922(3)                                                     | 18.1016(2)                                                     |
| c/Å                                            | 26.2336(3)                                                     | 29.8915(2)                                                     |
| $\alpha/^\circ$                                | 111.5130(10)                                                   | 90                                                             |
| $\beta/^\circ$                                 | 96.0020(10)                                                    | 96.5800(10)                                                    |
| $\gamma/^\circ$                                | 96.3570(10)                                                    | 90                                                             |
| Volume/Å <sup>3</sup>                          | 7053.79(17)                                                    | 8386.97(12)                                                    |
| Z                                              | 2                                                              | 2                                                              |
| $\rho_{\text{calc}}/\text{cm}^3$               | 1.712                                                          | 1.451                                                          |
| $\mu/\text{mm}^{-1}$                           | 11.260                                                         | 9.473                                                          |
| F(000)                                         | 3598.0                                                         | 3632.0                                                         |
| Radiation                                      | micro-focus metaljet ( $\lambda = 1.3405$ )                    | micro-focus metaljet ( $\lambda = 1.3405$ )                    |
| 2 $\theta$ range for data collection/ $^\circ$ | 3.686 to 120.854                                               | 4.97 to 120.286                                                |
| Index ranges                                   | $-15 \leq h \leq 16, -29 \leq k \leq 27, -33 \leq l \leq 33$   | $-20 \leq h \leq 19, -22 \leq k \leq 22, -31 \leq l \leq 38$   |
| Reflections collected                          | 101285                                                         | 75852                                                          |
| Independent reflections                        | 31498 [ $R_{\text{int}} = 0.0480, R_{\text{sigma}} = 0.0460$ ] | 18686 [ $R_{\text{int}} = 0.0619, R_{\text{sigma}} = 0.0508$ ] |
| Data/restraints/parameters                     | 31498/4/1420                                                   | 18686/0/738                                                    |
| Goodness-of-fit on $F^2$                       | 1.049                                                          | 1.033                                                          |
| Final R indexes [ $I \geq 2\sigma(I)$ ]        | $R_1 = 0.0437, wR_2 = 0.1063$                                  | $R_1 = 0.0584, wR_2 = 0.1690$                                  |

|                                             |                                                   |                                                   |
|---------------------------------------------|---------------------------------------------------|---------------------------------------------------|
| Final R indexes [all data]                  | R <sub>1</sub> = 0.0515, wR <sub>2</sub> = 0.1109 | R <sub>1</sub> = 0.0660, wR <sub>2</sub> = 0.1766 |
| Largest diff. peak/hole / e Å <sup>-3</sup> | 3.48/-2.28                                        | 3.80/-1.92                                        |

**Table S2** Crystal data and structure refinement for **TOC-53** and **TOC-54**.

| Compound                                              | TOC-53                                                              | TOC-54                                                              |
|-------------------------------------------------------|---------------------------------------------------------------------|---------------------------------------------------------------------|
| Crystal formula                                       | C <sub>14</sub> H <sub>25</sub> Cl <sub>3</sub> O <sub>7</sub> SnTi | C <sub>15</sub> H <sub>27</sub> Cl <sub>3</sub> O <sub>7</sub> SnTi |
| Formula weight                                        | 578.28                                                              | 592.30                                                              |
| Temperature/K                                         | 100.00(10)                                                          | 100.00(10)                                                          |
| Crystal system                                        | monoclinic                                                          | triclinic                                                           |
| Space group                                           | <i>P</i> 2 <sub>1</sub> / <i>c</i>                                  | <i>P</i> -1                                                         |
| <i>a</i> /Å                                           | 9.85680(10)                                                         | 9.0964(2)                                                           |
| <i>b</i> /Å                                           | 16.8341(3)                                                          | 9.3132(2)                                                           |
| <i>c</i> /Å                                           | 12.5136(2)                                                          | 14.5943(3)                                                          |
| $\alpha$ /°                                           | 90                                                                  | 73.634(2)                                                           |
| $\beta$ /°                                            | 92.6740(10)                                                         | 89.391(2)                                                           |
| $\gamma$ /°                                           | 90                                                                  | 67.044(2)                                                           |
| Volume/Å <sup>3</sup>                                 | 2074.13(5)                                                          | 1085.42(4)                                                          |
| <i>Z</i>                                              | 4                                                                   | 2                                                                   |
| $\rho_{\text{calc}}/\text{cm}^3$                      | 1.852                                                               | 1.812                                                               |
| $\mu/\text{mm}^{-1}$                                  | 11.341                                                              | 10.846                                                              |
| <i>F</i> (000)                                        | 1152.0                                                              | 592.0                                                               |
| Radiation                                             | micro-focus metaljet ( $\lambda$ = 1.3405)                          | micro-focus metaljet ( $\lambda$ = 1.3405)                          |
| 2 $\theta$ range for data collection/°                | 7.658 to 120.342                                                    | 5.522 to 119.932                                                    |
| Index ranges                                          | -12 ≤ <i>h</i> ≤ 12, -21 ≤ <i>k</i> ≤ 20, -8 ≤ <i>l</i> ≤ 16        | -11 ≤ <i>h</i> ≤ 10, -12 ≤ <i>k</i> ≤ 11, -18 ≤ <i>l</i> ≤ 18       |
| Reflections collected                                 | 17404                                                               | 13333                                                               |
| Independent reflections                               | 4619 [R <sub>int</sub> = 0.0490, R <sub>sigma</sub> = 0.0417]       | 4791 [R <sub>int</sub> = 0.0310, R <sub>sigma</sub> = 0.0286]       |
| Data/restraints/parameters                            | 4619/0/238                                                          | 4791/0/247                                                          |
| Goodness-of-fit on <i>F</i> <sup>2</sup>              | 1.077                                                               | 1.043                                                               |
| Final R indexes [ <i>I</i> ≥ 2 $\sigma$ ( <i>I</i> )] | R <sub>1</sub> = 0.0377, wR <sub>2</sub> = 0.1028                   | R <sub>1</sub> = 0.0241, wR <sub>2</sub> = 0.0612                   |
| Final R indexes [all data]                            | R <sub>1</sub> = 0.0416, wR <sub>2</sub> = 0.1051                   | R <sub>1</sub> = 0.0247, wR <sub>2</sub> = 0.0616                   |
| Largest diff. peak/hole / e Å <sup>-3</sup>           | 1.36/-1.56                                                          | 0.92/-0.90                                                          |

**Table S3** Crystal data and structure refinement for **TOC-55** and **TOC-56**.

| Compound        | TOC-55                                                                                          | TOC-56                                                                                          |
|-----------------|-------------------------------------------------------------------------------------------------|-------------------------------------------------------------------------------------------------|
| Crystal formula | C <sub>24</sub> H <sub>48</sub> Cl <sub>6</sub> O <sub>13</sub> Sn <sub>2</sub> Ti <sub>2</sub> | C <sub>48</sub> H <sub>88</sub> Cl <sub>6</sub> O <sub>26</sub> Sn <sub>2</sub> Ti <sub>6</sub> |
| Formula weight  | 1090.50                                                                                         | 1820.55                                                                                         |
| Temperature/K   | 100.00(10)                                                                                      | 100.0(2)                                                                                        |
| Crystal system  | monoclinic                                                                                      | triclinic                                                                                       |
| Space group     | <i>Cc</i>                                                                                       | <i>P</i> -1                                                                                     |
| <i>a</i> /Å     | 8.98520(10)                                                                                     | 12.3168(4)                                                                                      |

|                                             |                                                                    |                                                                     |
|---------------------------------------------|--------------------------------------------------------------------|---------------------------------------------------------------------|
| b/Å                                         | 18.3443(2)                                                         | 14.0058(4)                                                          |
| c/Å                                         | 25.5115(2)                                                         | 15.4344(3)                                                          |
| $\alpha$ /°                                 | 90                                                                 | 110.064(2)                                                          |
| $\beta$ /°                                  | 95.5520(10)                                                        | 92.418(2)                                                           |
| $\gamma$ /°                                 | 90                                                                 | 112.772(3)                                                          |
| Volume/Å <sup>3</sup>                       | 4185.26(7)                                                         | 2258.45(12)                                                         |
| Z                                           | 4                                                                  | 1                                                                   |
| $\rho_{\text{calc}}/\text{cm}^3$            | 1.731                                                              | 1.337                                                               |
| $\mu/\text{mm}^{-1}$                        | 11.200                                                             | 7.285                                                               |
| F(000)                                      | 2168.0                                                             | 918.0                                                               |
| Radiation                                   | micro-focus metaljet ( $\lambda =$<br>1.3405)                      | micro-focus metaljet ( $\lambda = 1.3405$ )                         |
| 2 $\theta$ range for data collection/°      | 6.052 to 120.164                                                   | 6.462 to 120.328                                                    |
| Index ranges                                | -5 $\leq h \leq$ 11, -22 $\leq k \leq$ 23, -32<br>$\leq l \leq$ 32 | -15 $\leq h \leq$ 15, -18 $\leq k \leq$ 16, -19 $\leq l \leq$<br>19 |
| Reflections collected                       | 15569                                                              | 27705                                                               |
| Independent reflections                     | 5471 [ $R_{\text{int}} = 0.0320$ , $R_{\text{sigma}} =$<br>0.0323] | 9981 [ $R_{\text{int}} = 0.0727$ , $R_{\text{sigma}} =$<br>0.0659]  |
| Data/restraints/parameters                  | 5471/2/430                                                         | 9981/1/401                                                          |
| Goodness-of-fit on $F^2$                    | 1.048                                                              | 1.077                                                               |
| Final R indexes [ $ I  \geq 2\sigma(I)$ ]   | $R_1 = 0.0333$ , $wR_2 = 0.0890$                                   | $R_1 = 0.0620$ , $wR_2 = 0.1759$                                    |
| Final R indexes [all data]                  | $R_1 = 0.0337$ , $wR_2 = 0.0894$                                   | $R_1 = 0.0687$ , $wR_2 = 0.1815$                                    |
| Largest diff. peak/hole / e Å <sup>-3</sup> | 1.17/-0.77                                                         | 2.89/-1.90                                                          |

**Table S4** Crystal data and structure refinement for **TOC-57** and **TOC-58**.

| Compound                         | TOC-57                                                                                             | TOC-58                                                                                              |
|----------------------------------|----------------------------------------------------------------------------------------------------|-----------------------------------------------------------------------------------------------------|
| Crystal formula                  | C <sub>96</sub> H <sub>178</sub> Cl <sub>14</sub> O <sub>54</sub> Sn <sub>6</sub> Ti <sub>14</sub> | C <sub>144</sub> H <sub>264</sub> Cl <sub>12</sub> O <sub>82</sub> Sn <sub>8</sub> Ti <sub>20</sub> |
| Formula weight                   | 4075.41                                                                                            | 5640.46                                                                                             |
| Temperature/K                    | 100.00(13)                                                                                         | 100.00(17)                                                                                          |
| Crystal system                   | monoclinic                                                                                         | cubic                                                                                               |
| Space group                      | <i>P</i> 2 <sub>1</sub> / <i>c</i>                                                                 | <i>I</i> -43 <i>d</i>                                                                               |
| a/Å                              | 15.2738(2)                                                                                         | 41.7993(2)                                                                                          |
| b/Å                              | 23.1167(2)                                                                                         | 41.7993(2)                                                                                          |
| c/Å                              | 23.1453(2)                                                                                         | 41.7993(2)                                                                                          |
| $\alpha$ /°                      | 90                                                                                                 | 90                                                                                                  |
| $\beta$ /°                       | 106.9090(10)                                                                                       | 90                                                                                                  |
| $\gamma$ /°                      | 90                                                                                                 | 90                                                                                                  |
| Volume/Å <sup>3</sup>            | 7818.84(15)                                                                                        | 73031.0(10)                                                                                         |
| Z                                | 2                                                                                                  | 12                                                                                                  |
| $\rho_{\text{calc}}/\text{cm}^3$ | 1.731                                                                                              | 1.539                                                                                               |
| $\mu/\text{mm}^{-1}$             | 10.899                                                                                             | 9.164                                                                                               |
| F(000)                           | 4064.0                                                                                             | 33936.0                                                                                             |
| Radiation                        | micro-focus metaljet ( $\lambda =$<br>1.3405)                                                      | micro-focus metaljet ( $\lambda =$<br>1.3405)                                                       |

|                                                  |                                                                        |                                                                        |
|--------------------------------------------------|------------------------------------------------------------------------|------------------------------------------------------------------------|
| 2 $\theta$ range for data collection/ $^{\circ}$ | 4.804 to 120.398                                                       | 4.502 to 120.446                                                       |
| Index ranges                                     | -18 $\leq$ h $\leq$ 19, -29 $\leq$ k $\leq$ 28, -29 $\leq$ l $\leq$ 24 | -37 $\leq$ h $\leq$ 54, -36 $\leq$ k $\leq$ 52, -50 $\leq$ l $\leq$ 23 |
| Reflections collected                            | 67350                                                                  | 37310                                                                  |
| Independent reflections                          | 17394 [R <sub>int</sub> = 0.0651, R <sub>sigma</sub> = 0.0501]         | 12754 [R <sub>int</sub> = 0.0541, R <sub>sigma</sub> = 0.0535]         |
| Data/restraints/parameters                       | 17394/65/847                                                           | 12754/60/606                                                           |
| Goodness-of-fit on F <sup>2</sup>                | 1.054                                                                  | 1.045                                                                  |
| Final R indexes [ $ I  \geq 2\sigma(I)$ ]        | R <sub>1</sub> = 0.0638, wR <sub>2</sub> = 0.1778                      | R <sub>1</sub> = 0.0936, wR <sub>2</sub> = 0.2343                      |
| Final R indexes [all data]                       | R <sub>1</sub> = 0.0750, wR <sub>2</sub> = 0.1872                      | R <sub>1</sub> = 0.1229, wR <sub>2</sub> = 0.2620                      |
| Largest diff. peak/hole / e $\text{\AA}^{-3}$    | 2.87/-3.49                                                             | 1.67/-1.20                                                             |

## 4. Bond valence sum calculations

**Table S5** BVS calculation of Sn atom in **TOC-57**.

|     |       |              |       |
|-----|-------|--------------|-------|
| Sn1 | 2.093 |              |       |
| Sn1 | Cl1   | d=2.5079(19) | 0.766 |
| Sn1 | Cl6   | d=2.5174(18) | 0.748 |
| Sn1 | O27   | d=2.142(4)   | 0.579 |
| Sn2 | 2.314 |              |       |
| Sn2 | Cl5   | d=2.415(3)   | 0.987 |
| Sn2 | Cl3   | d=2.439(3)   | 0.925 |
| Sn2 | O26   | d=2.277(4)   | 0.402 |
| Sn3 | 4.085 |              |       |
| Sn3 | Cl4   | d=2.379(2)   | 0.759 |
| Sn3 | Cl7   | d=2.3945(16) | 0.726 |
| Sn3 | Cl2   | d=2.3768(19) | 0.759 |
| Sn3 | O5    | d=2.052(4)   | 0.672 |
| Sn3 | O21   | d=2.098(4)   | 0.591 |
| Sn3 | O11   | d=2.109(5)   | 0.578 |

**Table S6** BVS calculation of Sn atom in **TOC-58**.

|     |       |             |       |
|-----|-------|-------------|-------|
| Sn6 | 4.151 |             |       |
| Sn6 | Cl9   | d=2.415(5)  | 0.687 |
| Sn6 | Cl10  | d=2.384(6)  | 0.747 |
| Sn6 | Cl12  | d=2.382(6)  | 0.749 |
| Sn6 | O71   | d=2.040(15) | 0.696 |
| Sn6 | O76   | d=2.068(15) | 0.644 |
| Sn6 | O80   | d=2.077(15) | 0.628 |
| Sn8 | 2.161 |             |       |
| Sn8 | O441  | d=2.315(12) | 0.364 |
| Sn8 | O481  | d=2.334(14) | 0.344 |
| Sn8 | O56   | d=2.320(13) | 0.357 |



|     |     |             |       |
|-----|-----|-------------|-------|
| Sn8 | O63 | d=2.212(13) | 0.478 |
| Sn8 | O67 | d=2.118(14) | 0.618 |

## 5. Additional structural pictures

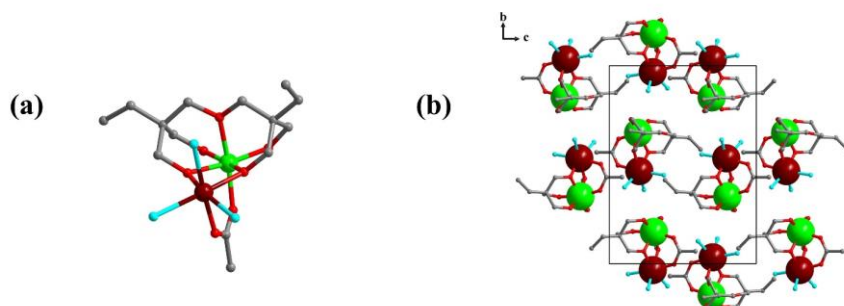

**Figure S1** The cluster structure (a), and packing mode (b) of **TOC-53**. Color codes: dark red Sn; green Ti; blue Cl; gray C; red O. H atoms are omitted for clarity.

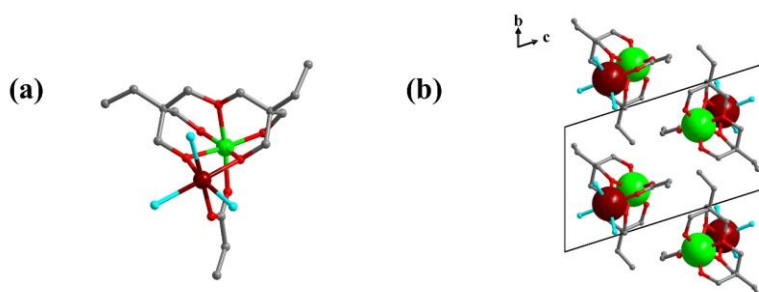

**Figure S2** The cluster structure (a), and packing mode (b) of **TOC-54**. Color codes: dark red Sn; green Ti; blue Cl; gray C; red O. H atoms are omitted for clarity.

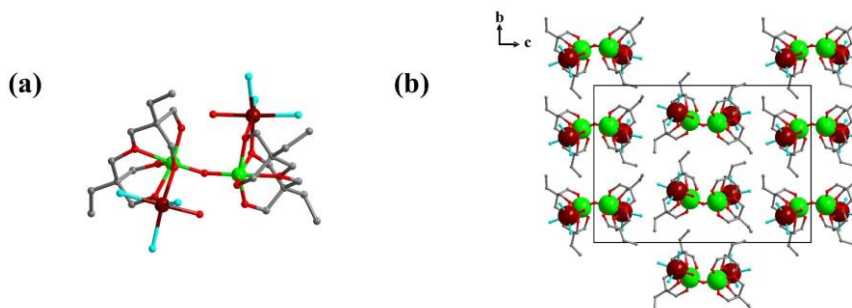

**Figure S3** The cluster structure (a), and packing mode (b) of **TOC-55**. Color codes: dark red Sn; green Ti; blue Cl; gray C; red O. H atoms are omitted for clarity.

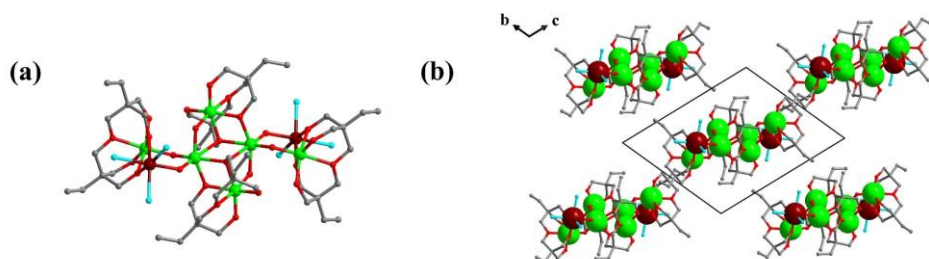

**Figure S4** The cluster structure (a), and packing mode (b) of **TOC-56**. Color codes: dark red Sn; green Ti; blue Cl; gray C; red O. H atoms are omitted for clarity.

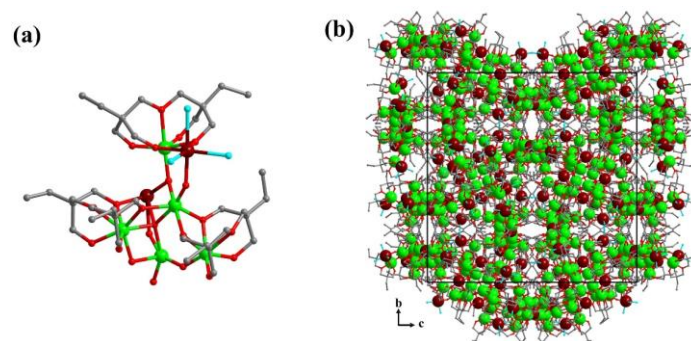

**Figure S5** The asymmetric unit (a) and packing mode (b) of **TOC-58**. Color codes: dark red Sn; green Ti; blue Cl; gray C; red O. H atoms are omitted for clarity.

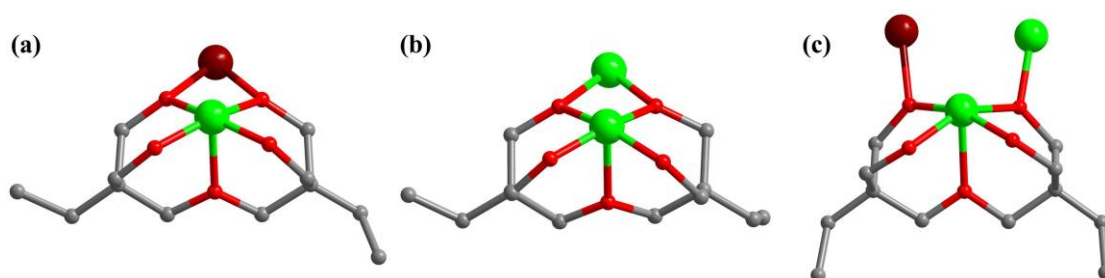

**Figure S6** The chelation modes of di(trimethylolpropane) in **TOC-58**.

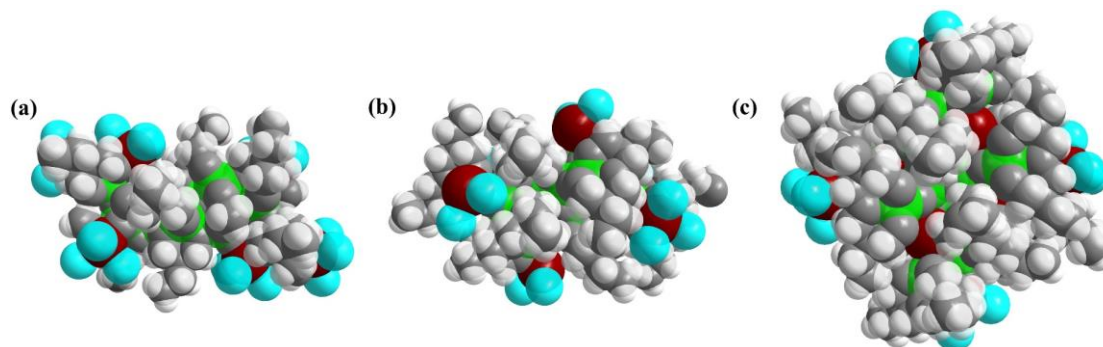

**Figure S7** Space-filling model of the structures of **TOC-51** (a), **TOC-57** (b) and **TOC-58** (c), highlighting the exposed Sn atoms active sites; Color codes: dark red Sn; green Ti; blue Cl; gray C and O; white H.

## 6. Powder-XRD patterns

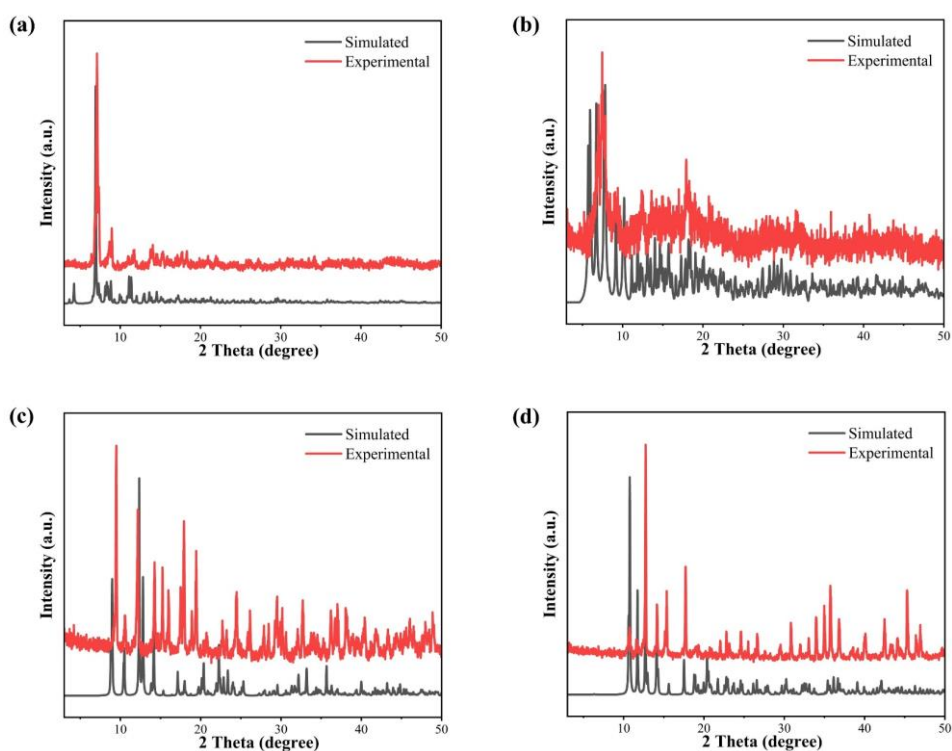

**Figure S8** Simulated and experimental PXR patterns of **TOC-51** (a), **TOC-52** (b), **TOC-53** (c) and **TOC-54** (d).

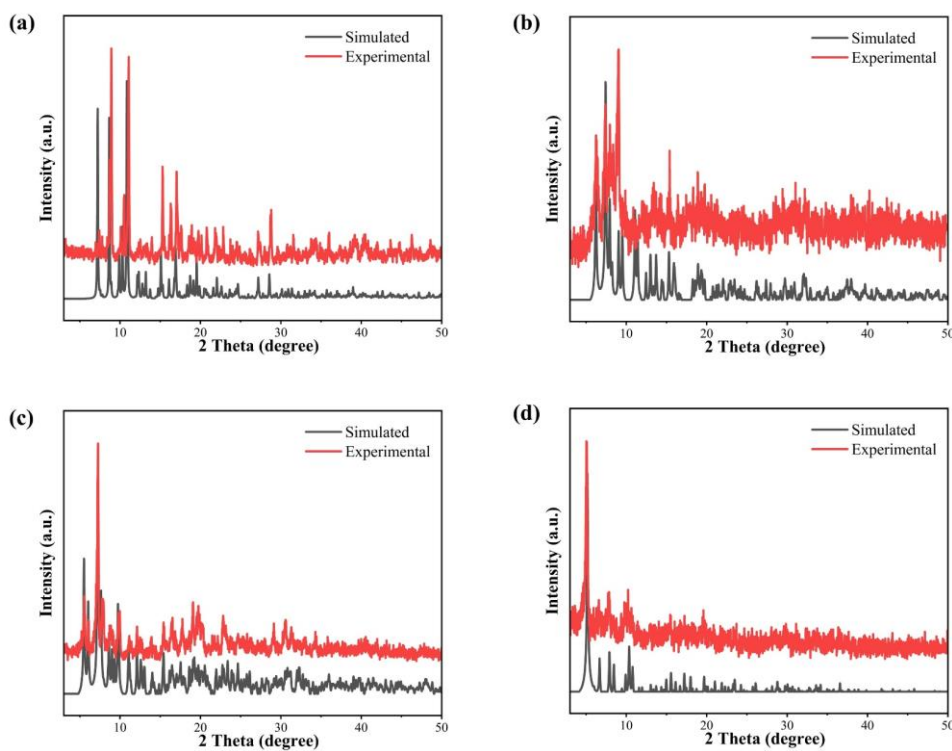

**Figure S9** Simulated and experimental PXR patterns of **TOC-55** (a), **TOC-56** (b), **TOC-57** (c) and **TOC-58** (d).

## 7. The energy dispersive X-ray spectroscopy (EDS) spectra

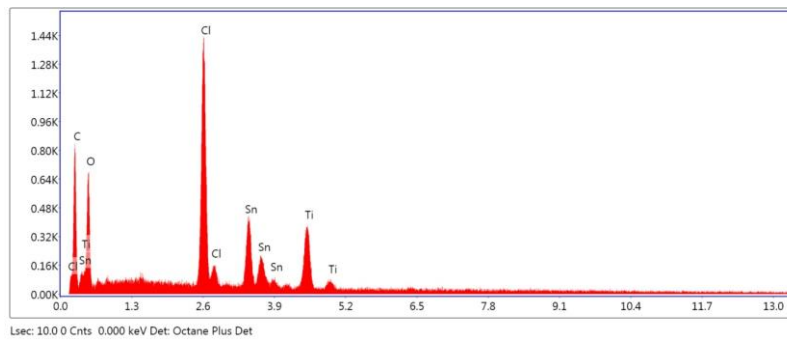

**Figure S10** The EDS spectrum of TOC-51.

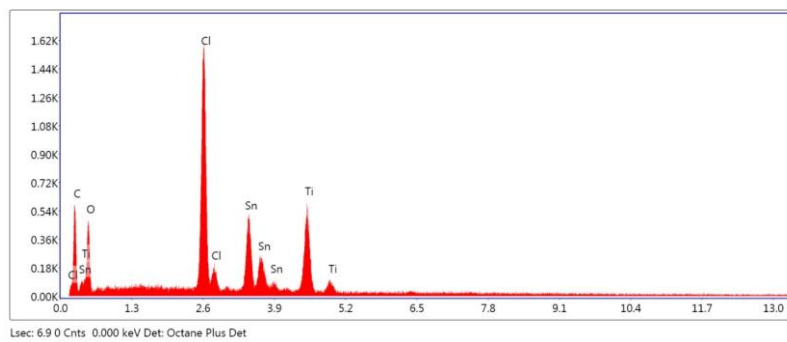

**Figure S11** The EDS spectrum of TOC-52.

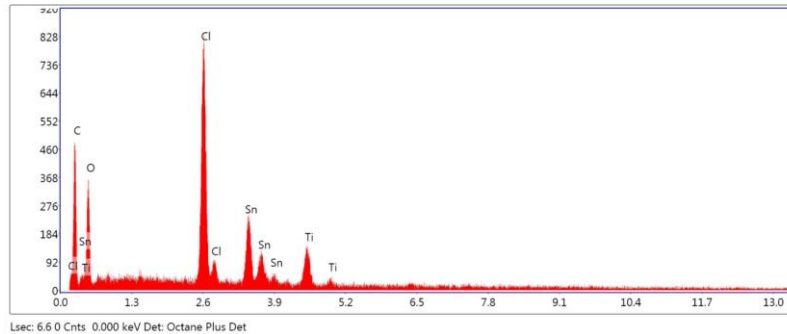

**Figure S12** The EDS spectrum of TOC-53.

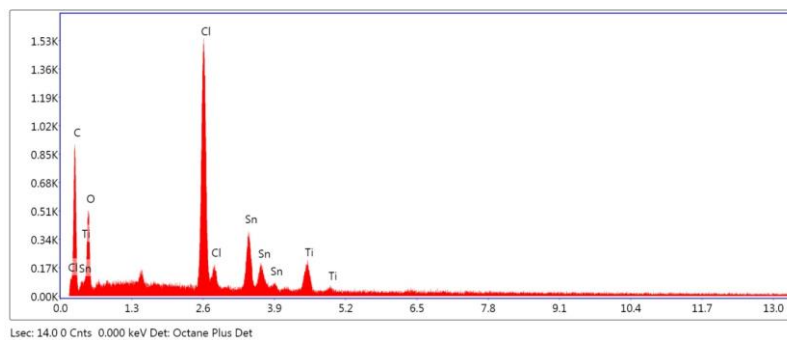

**Figure S13** The EDS spectrum of TOC-54.

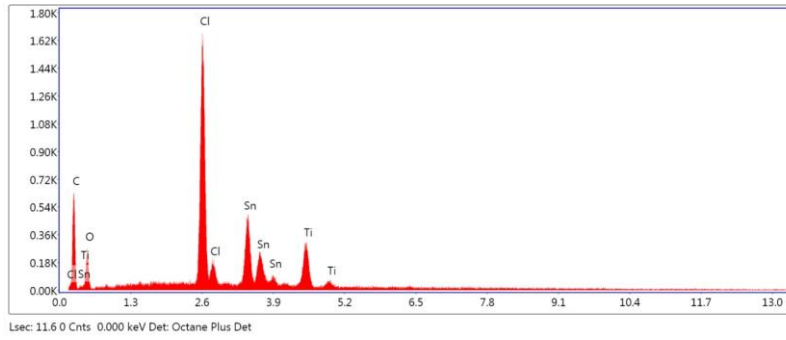

**Figure S14** The EDS spectrum of TOC-55.

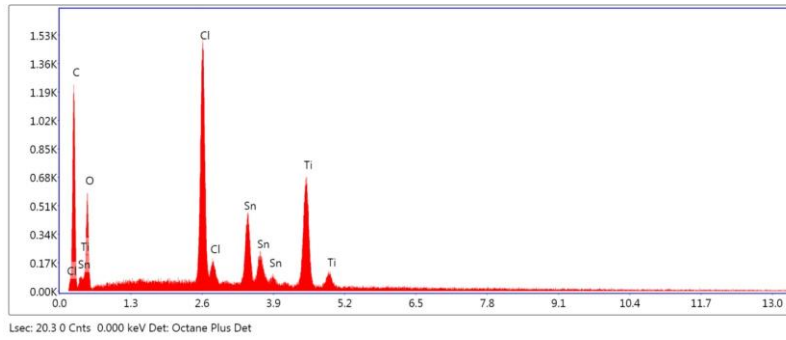

**Figure S15** The EDS spectrum of TOC-56.

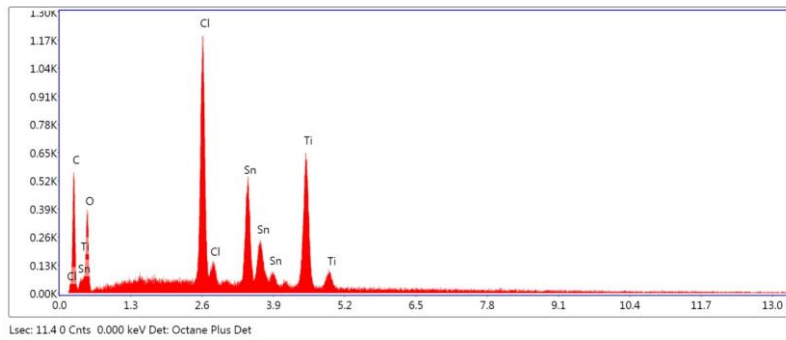

**Figure S16** The EDS spectrum of TOC-57.

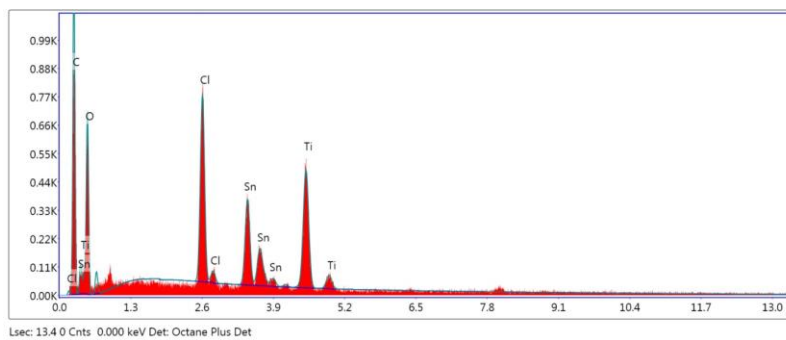

**Figure S17** The EDS spectrum of TOC-58.

## 8. Thermogravimetrical analysis (TG)

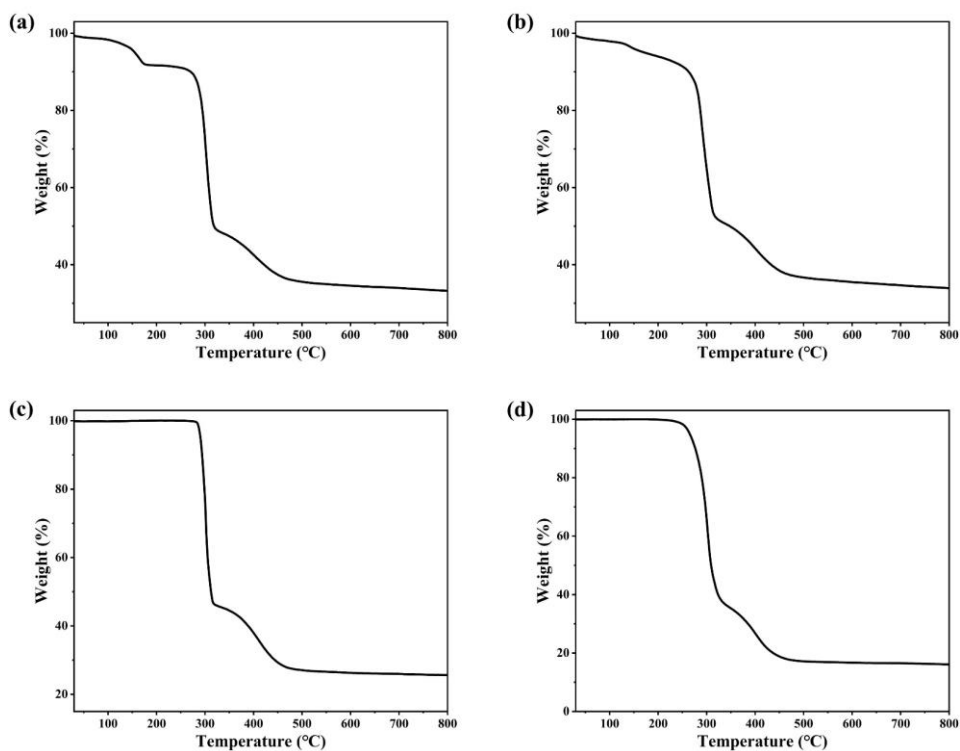

Figure S18 TG curve of TOC-51 (a), TOC-52 (b), TOC-53 (c) and TOC-54 (d) in N<sub>2</sub> atmosphere.

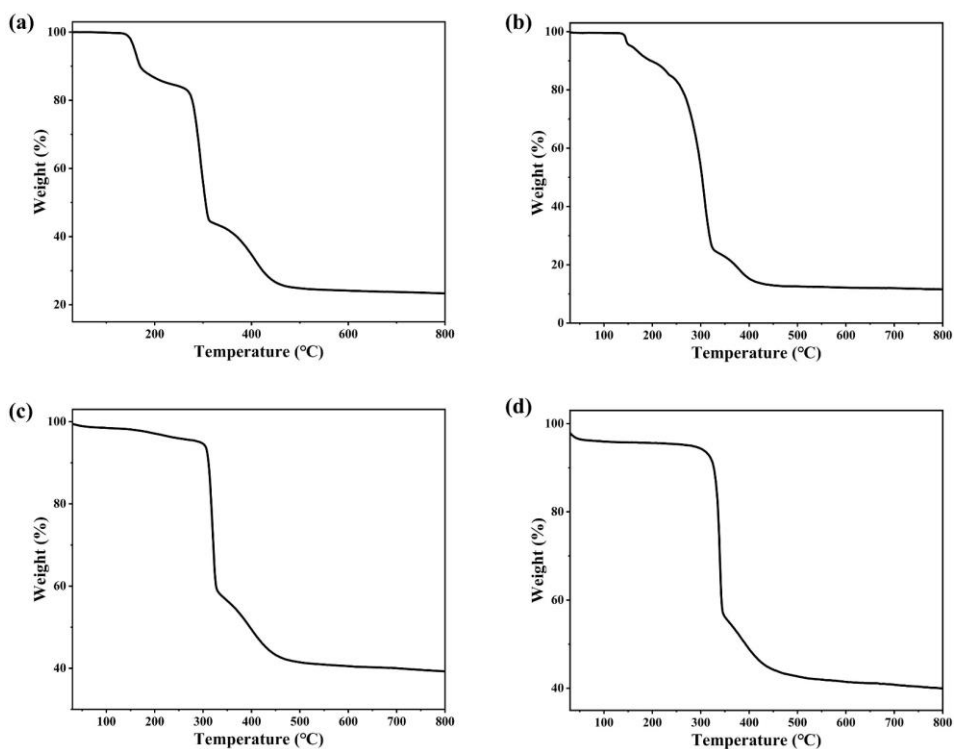

Figure S19 TG curve of TOC-55 (a), TOC-56 (b), TOC-57 (c) and TOC-58 (d) in N<sub>2</sub> atmosphere.

## 9. IR spectra

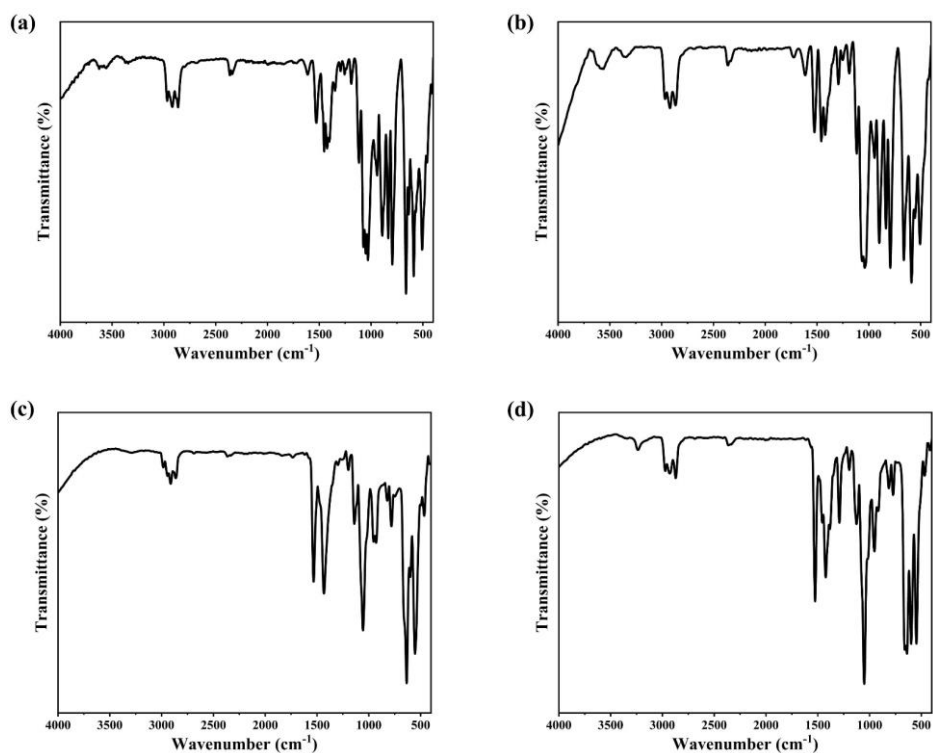

Figure S20 FT-IR spectrum of TOC-51 (a), TOC-52 (b), TOC-53 (c) and TOC-54 (d).

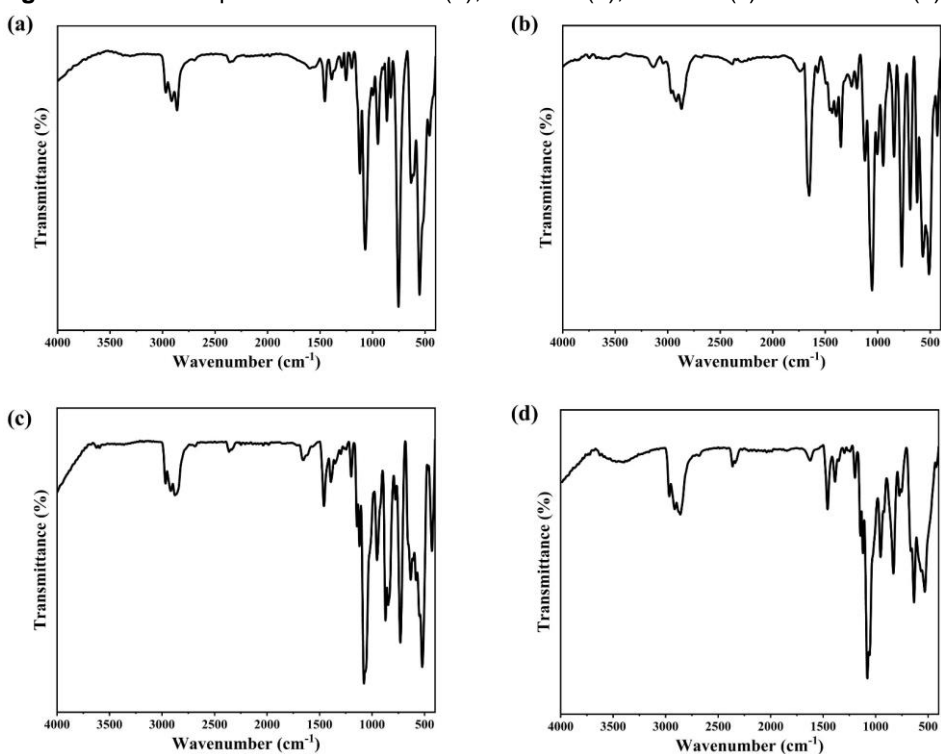

Figure S21 FT-IR spectrum of TOC-55 (a), TOC-56 (b), TOC-57 (c) and TOC-58 (d).

## 10. UV-Vis parameters

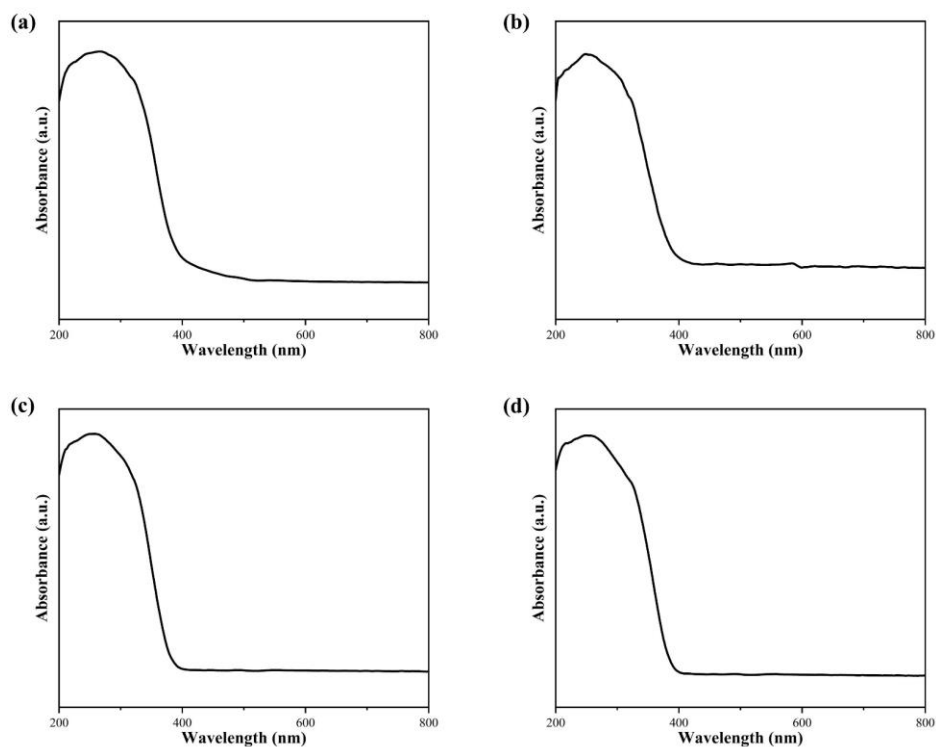

**Figure S22** UV-vis diffuse reflectance spectrum of TOC-51 (a), TOC-52 (b), TOC-53 (c) and TOC-54 (d).

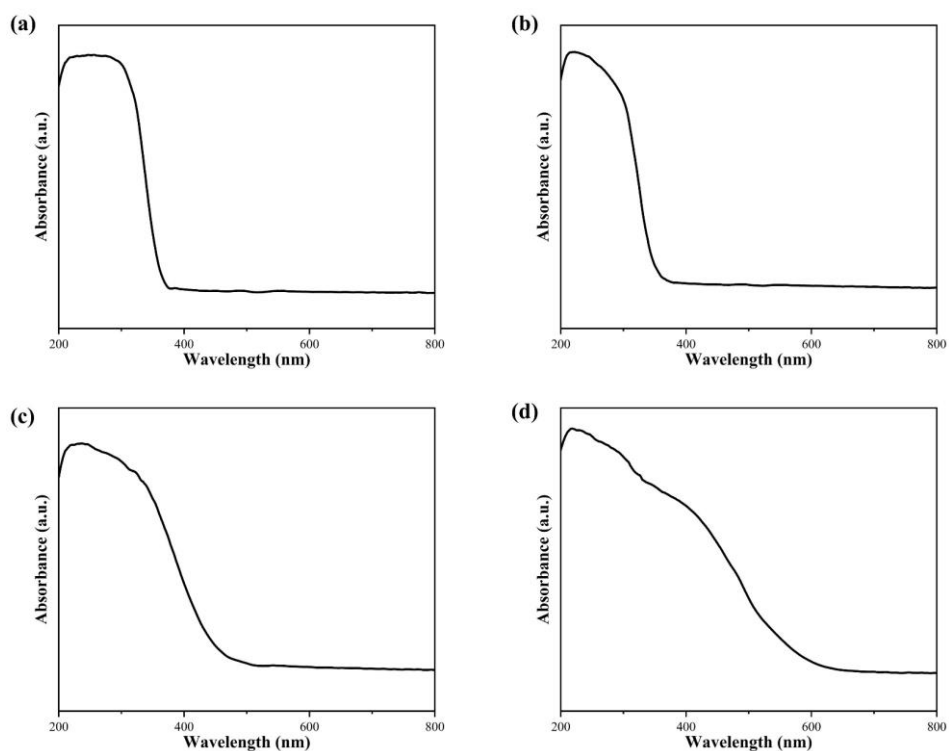

**Figure S23** UV-vis diffuse reflectance spectrum of TOC-55 (a), TOC-56 (b), TOC-57 (c) and TOC-58 (d).



## 11. ICP results

**Table S7** The summary of ICP results

| Compound      | Found Sn (%) | Found Ti (%) | Found               | Calculated       |
|---------------|--------------|--------------|---------------------|------------------|
| <b>TOC-51</b> | 18.45        | 12.46        | Sn : Ti = 6 : 10.05 | Sn : Ti = 6 : 10 |
| <b>TOC-52</b> | 15.28        | 10.86        | Sn : Ti = 6 : 10.57 | Sn : Ti = 6 : 10 |
| <b>TOC-53</b> | 16.25        | 8.28         | Sn : Ti = 1 : 1.26  | Sn : Ti = 1 : 1  |
| <b>TOC-54</b> | 17.37        | 7.13         | Sn : Ti = 1 : 1.02  | Sn : Ti = 1 : 1  |
| <b>TOC-55</b> | 15.72        | 7.79         | Sn : Ti = 2 : 2.46  | Sn : Ti = 2 : 2  |
| <b>TOC-56</b> | 11.11        | 14.32        | Sn : Ti = 2 : 6.39  | Sn : Ti = 2 : 6  |
| <b>TOC-57</b> | 17.56        | 16.07        | Sn : Ti = 6 : 13.62 | Sn : Ti = 6 : 14 |
| <b>TOC-58</b> | 14.91        | 14.91        | Sn : Ti = 8 : 20.09 | Sn : Ti = 8 : 20 |

## 12. Additional texts

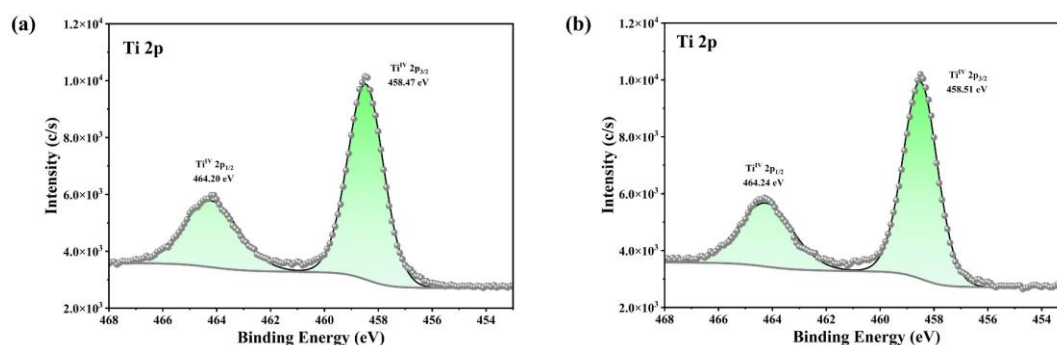

**Figure S24** (a) and (b) Ti 2p XPS signals of **TOC-57** and **TOC-58**.

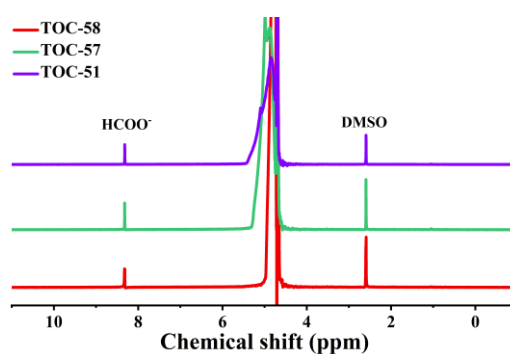

**Figure S25**  $^1\text{H}$  NMR spectrum of the  $\text{KHCO}_3$  catholyte after 1200 s of  $\text{CO}_2$  reduction on **TOC-51**, **TOC-57** and **TOC-58** derived electrodes,  $E(\text{RHE}) = -1.0$  V.

### 13. Electrochemical Measurements

Electrochemical experiments were performed on a CHI 760e electrochemical workstation (Chenhua, Shanghai, China) using a gas-tight two-compartment electrochemical cell with a Nafion-117 proton exchange membrane as the separator. Each compartment contained 20 mL of 0.5 M KHCO<sub>3</sub> electrolyte, and the electrolyte was pre-saturated with high-purity N<sub>2</sub> or CO<sub>2</sub>. The platinum net (1.0 ×1.0 cm<sup>2</sup>) electrode and the Ag/AgCl electrode (the saturated KCl filling solution) were used as counter and reference electrode, respectively. The reference electrode potentials were converted to the value versus RHE by the equation: E (vs. RHE) = E (vs. Ag/AgCl) + 0.197 V + 0.0591 V × pH. The working electrode was prepared by pipetting the 50 uL of sample ink onto a carbon paper electrode (1×1 cm<sup>2</sup>) with a loading of 0.53 mg/cm<sup>2</sup>. Typically, 5.3 mg of sample was dispersed into H<sub>2</sub>O/ethanol (370/80 uL) solution followed by adding 50 uL Nafion, then the mixture was ultrasonicated for 30 min to achieve a homogeneous ink.

For CO<sub>2</sub> electroreduction reaction, a flow of 20 sccm of CO<sub>2</sub> was continuously bubbled into the electrolyte to maintain its saturation. The linear sweep voltammetry (LSV) was performed at a scan rate of 5 mV/s. The electrolysis was conducted at selected potentials for 2 h to determine the reduction products and their Faradaic efficiencies.

Analysis of liquid products by NMR: 10.0 mL of D<sub>2</sub>O was mixed with 3.53 μL of dimethyl sulfoxide (DMSO) as solution A for next step. Then, 500 μL of the electrolyte after electrolysis was mixed with 100 μL of D<sub>2</sub>O and 50 μL of solution A (DMSO as internal standard) for <sup>1</sup>H NMR analysis. The water suppression method was used.

The gaseous products (H<sub>2</sub> and CO) were periodically sampled and examined by gas chromatography (GC-2014C, SHIMADZU) with N<sub>2</sub> as the carrier gas. They were first analyzed by a thermal conductivity detector (TCD) for the H<sub>2</sub> concentration, and then analyzed by flame ionization detector (FID) with a methanizer for CO. The concentration of gaseous products was quantified by the integral area ratio of the reduction products to standards.

The faradic efficiency of formate was calculated as follow [5]:

$$FE(\%) = \frac{Q_{\text{formate}}}{Q_{\text{total}}} = \frac{n_{\text{formate}} \times N \times F \times 100\%}{j \times t} \quad (1)$$

Where  $n_{\text{formate}}$  is the measured amount of formate in the cathodic compartment;  $N$  is the number of electrons required to form a molecule of formate ( $N = 2$ );  $F$  is the Faraday constant;  $j$  is the recorded current;  $t$  is the reaction time.

The faradic efficiencies of gaseous products were calculated as follow [6]:

The volume of the sample loop ( $V_0$ ) in GC is 1 cm<sup>3</sup> and the flow rate of the gas is  $v = 20$  cm<sup>3</sup>/min.

The time it takes to fill the sample loop is:

$$t_0 = \frac{V_0}{v} = \frac{1\text{cm}^3}{20\text{cm}^3/\text{min}} = 0.05\text{min} = 3\text{s} \quad (2)$$

According to the ideal gas law, under ambient temperature of 25°C, the amount of gas in each vial ( $V_0 = 1$  cm<sup>3</sup>) is:

$$n = \frac{P \times V_0}{R \times T_0} = \frac{1.013 \times 10^5 \text{Pa} \times 1 \times 10^{-6} \text{m}^3}{8.314 \text{J} \cdot \text{K}^{-1} \cdot \text{mol}^{-1} \times 298.15 \text{K}} = 4.0866 \times 10^{-5} \text{mol} \quad (3)$$

The number of electrons required to form a molecule of CO or H<sub>2</sub> are 2. Therefore, the number of electrons ( $n_i$ ) needed to get  $x_i$  ppm of CO or H<sub>2</sub> is:

$$n_i = x_i \times n \times N_A \times 2 \quad (4)$$

Total number of electrons ( $n_{total}$ ) measured during this sampling period:

$$n_{total} = \frac{j \times t_0}{e} \quad (5)$$

The Faraday constant  $F$  is:

$$F = N_A \times e = 6.022 \times 10^{23} \text{ mol}^{-1} \times 1.6022 \times 10^{-19} \text{ C} = 96484.484 \text{ C} \cdot \text{mol}^{-1} \quad (6)$$

Hence, the faradic efficiency of CO or H<sub>2</sub> is:

$$\text{FE}(\%) = \frac{n_i}{n_{total}} \times 100\% = \frac{x_i \times n \times F \times 2}{I_0 \times t_0} \times 100\% \quad (7)$$

Where  $i$  represents CO or H<sub>2</sub>;  $I_0$  is the recorded current obtained from the chronoamperogram;  $N_A$  is the Avogadro constant;  $e$  is elementary charge.

## 14. Faraday efficiency patterns

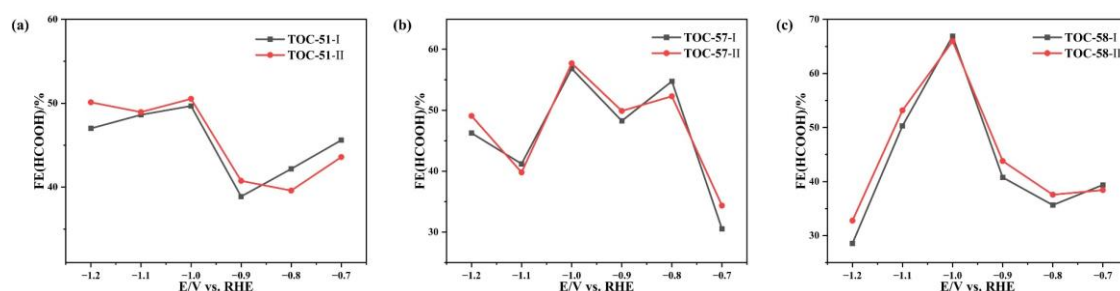

**Figure S26** Comparison of formate Faraday efficiency in two electrocatalysis experiments using **TOC-51** (a), **TOC-57** (b) and **TOC-58** (c).

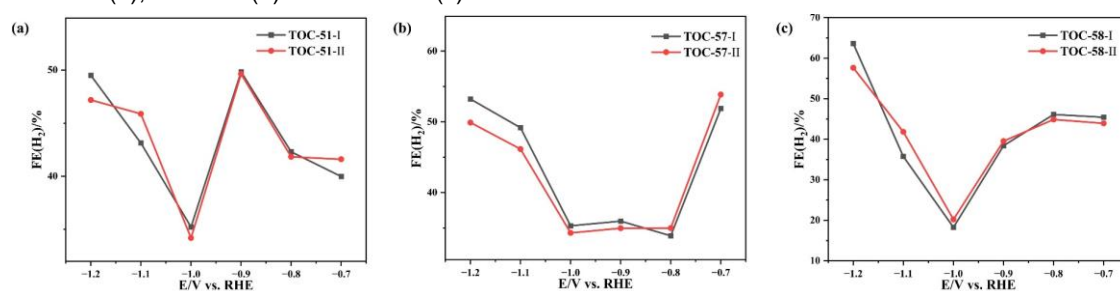

**Figure S27** Comparison of H<sub>2</sub> Faraday efficiency in two electrocatalysis experiments using **TOC-51** (a), **TOC-57** (b) and **TOC-58** (c).

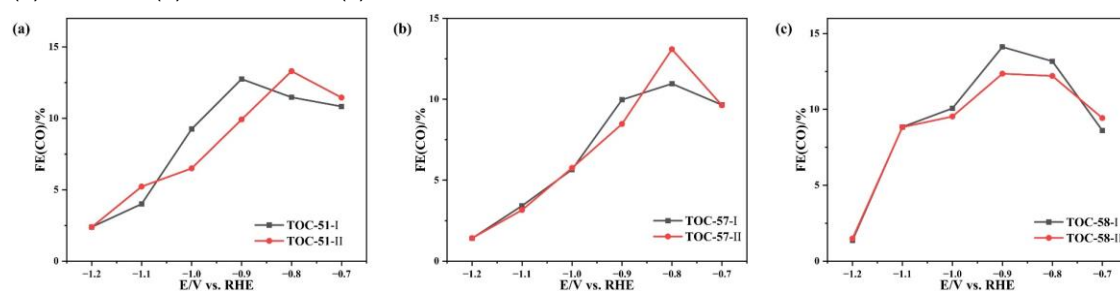

**Figure S28** Comparison of CO Faraday efficiency in two electrocatalysis experiments using **TOC-51** (a), **TOC-57** (b) and **TOC-58** (c).

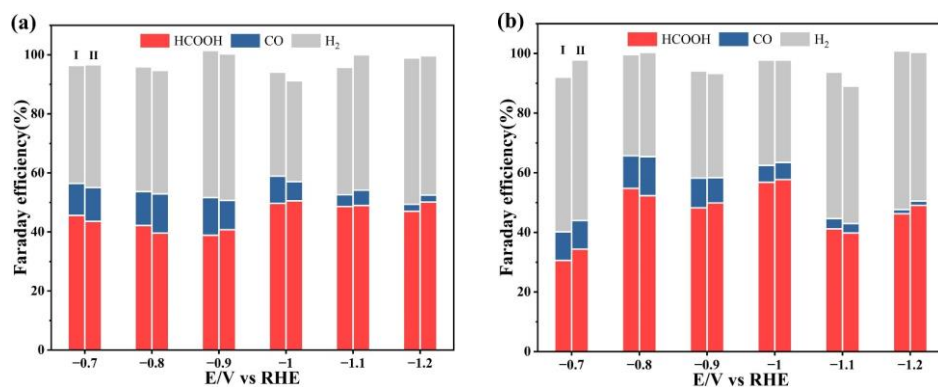

**Figure S29** Faradaic efficiency of **I** (first experiment) and **II** (second experiment) at different potentials of **TOC-51** (a) and **TOC-57** (b).

## 15. Stability testing of compounds

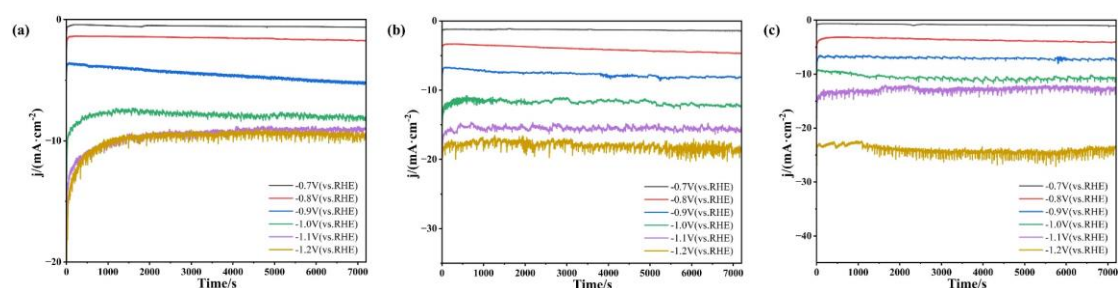

**Figure S30** Total current density vs. time curve during electrolysis at different applied potentials of **TOC-51** (a), **TOC-57** (b) and **TOC-58** (c).

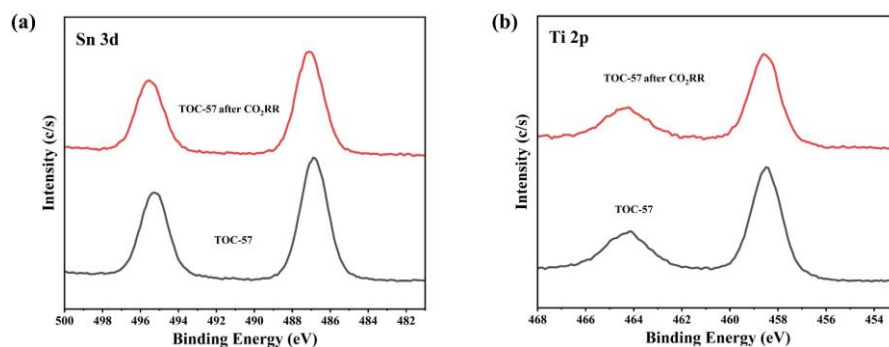

**Figure S31** XPS spectrum of compound **TOC-57** before and after CO<sub>2</sub>RR.

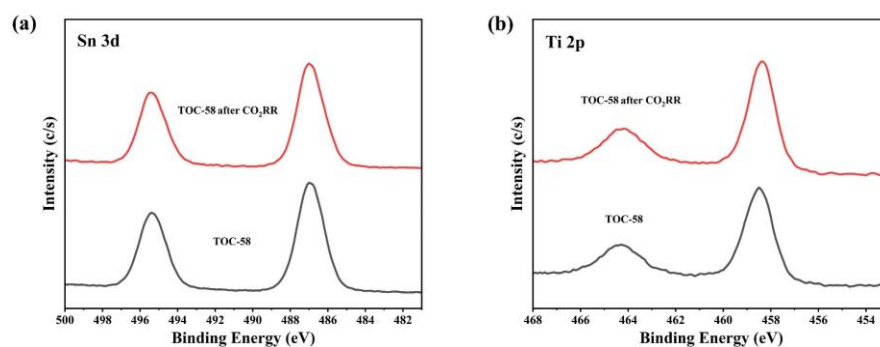

**Figure S32** XPS spectrum of compound **TOC-58** before and after CO<sub>2</sub>RR.

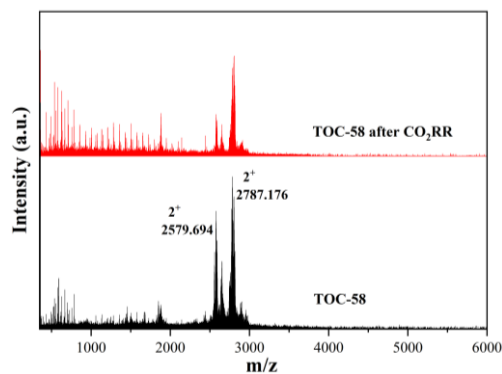

**Figure S33** ESI-MS spectrum of compound **TOC-58** before and after CO<sub>2</sub>RR.

## 16. Reference

- [1] O. V. Dolomanov, L. J. Bourhis, R. J. Gildea, J. A. K. Howard and H. Puschmann, OLEX2: a complete structure solution, refinement and analysis program. *J. Appl. Crystallogr.*, 2009, 42, 339-341.
- [2] G. M. Sheldrick, A short history of SHELX. *Acta Crystallogr.*, 2008, A64, 112-22.
- [3] G. M. Sheldrick, Crystal structure refinement with SHELXL. *Acta Crystallogr.*, 2015, C71, 3-8.
- [4] CrysAlisPro, Version 1.171.38.43b (Rigaku Oxford Diffraction, 2015) and CrysAlisPro 1.171.39.46 (Rigaku Oxford Diffraction, 2018) CrysAlisPro, Version 1.171.36.21 (release 14-08-2012 CrysAlis171.NET), Agilent Technologies.
- [5] A.L. Spek, *Acta Cryst.*, 2015, 71, 9-18.
- [6] D. Ren, Y. Deng, A.D. Handoko, C.S. Chen, S. Malkhandi and B.S. Yeo, *ACS Catal.*, 2015, 5, 28142821.
